# Supplementary material for: Association of Spinal Alignment Correction With Patient-Reported Outcomes in Adult Cervical Deformity: Review of the Literature
Source: PubMed Central journal article supplement — Neurospine. 2021 May 18;18(3):533–42. doi: 10.14245/ns.2040656.328 (PMC8497234; doi:10.14245/ns.2040656.328), 2021-05-18
Supplement: ns-2040656-328-suppl1.pdf [file ns-2040656-328-suppl1.pdf]

## SUPPLEMENTARY MATERIALS

### Supplementary Method 1. Literature Search Strategy

Search Strategy: ((Cervical Vertebrae[MeSH Terms]) OR (cervical deformity[Title/Abstract])) AND (((((Patient-Reported Outcomes[Title/Abstract]) OR (PROs[Title/Abstract])) OR (Health-related quality of life[Title/Abstract])) OR (HRQoL[Title/Abstract])) OR (treatment outcome[Title/Abstract]))

**Supplementary Table 1.** Quality of included studies per Newcastle-Ottawa Scale for quality assessment of cohort studies

| Study                 | Selection                                |                                    | Ascertainment of exposure | Comparability on basis of design and analysis | Outcome                  |                    | Adequacy of follow-up of cohorts |
|-----------------------|------------------------------------------|------------------------------------|---------------------------|-----------------------------------------------|--------------------------|--------------------|----------------------------------|
|                       | Representativeness of the exposed cohort | Selection of the nonexposed cohort |                           |                                               | Ascertainment of outcome | Adequate follow-up |                                  |
| Johnson22 (2019)      | **                                       | -                                  | **                        | **                                            | **                       | **                 | *                                |
| Pierce4 (2019)        | **                                       | -                                  | **                        | **                                            | **                       | **                 | *                                |
| Bakouny25 (2018)      | **                                       | -                                  | **                        | **                                            | **                       | **                 | *                                |
| Ailon14 (2017)        | **                                       | -                                  | **                        | **                                            | **                       | **                 | *                                |
| Hyun28 (2018)         | **                                       | -                                  | **                        | **                                            | **                       | **                 | *                                |
| Poorman15 (2017)      | **                                       | **                                 | **                        | **                                            | **                       | **                 | *                                |
| Oe26 (2017)           | **                                       | -                                  | **                        | **                                            | **                       | **                 | *                                |
| Passias16 (2018)      | **                                       | -                                  | **                        | **                                            | **                       | **                 | *                                |
| Passias32 (2018)      | **                                       | -                                  | **                        | **                                            | **                       | **                 | *                                |
| Grosso23 (2013)       | **                                       | -                                  | **                        | **                                            | **                       | **                 | *                                |
| Virk18 (2020)         | **                                       | -                                  | **                        | **                                            | **                       | **                 | *                                |
| Zhong29 (2018)        | **                                       | -                                  | **                        | **                                            | **                       | **                 | *                                |
| Smith3 (2017)         | **                                       | -                                  | **                        | **                                            | **                       | **                 | *                                |
| Horn19 (2019)         | **                                       | -                                  | **                        | **                                            | **                       | **                 | *                                |
| Bao24 (2017)          | **                                       | -                                  | **                        | **                                            | **                       | **                 | *                                |
| Segreto20 (2019)      | **                                       | -                                  | **                        | **                                            | **                       | **                 | *                                |
| Protopsaltis30 (2018) | **                                       | -                                  | **                        | **                                            | **                       | **                 | *                                |
| Lee27 (2015)          | **                                       | **                                 | **                        | **                                            | **                       | **                 | *                                |

Asterisks are the star ratings per the Newcastle-Ottawa Scale; \* and \*\* indicate the highest ratings for these categories.
