# Supplementary material for: Association of Spinal Alignment Correction With Patient-Reported Outcomes in Adult Cervical Deformity: Review of the Literature
Source: PubMed Central journal article supplement — Neurospine. 2021 May 18;18(3):533–42. doi: 10.14245/ns.2040656.328 (PMC8497234; doi:10.14245/ns.2040656.328), 2021-05-18
Supplement: ns-2040656-328-suppl3.pdf [file ns-2040656-328-suppl3.pdf]

**Supplementary Table 2.** Summary of studies examining the association of cervical parameters with patient-reported outcomes in adult cervical deformity

| Study                         | Study design                                                             | Country/organization                   | Study population                                                                                                                                                                                                                                                  | No. | Intervention                                                                                                                      | PRO instruments                                                                                                                     | Timing of PRO collection                             | Main findings                                                                                                                                                                                                                                                                                                                                                                                                                                                                                                             |
|-------------------------------|--------------------------------------------------------------------------|----------------------------------------|-------------------------------------------------------------------------------------------------------------------------------------------------------------------------------------------------------------------------------------------------------------------|-----|-----------------------------------------------------------------------------------------------------------------------------------|-------------------------------------------------------------------------------------------------------------------------------------|------------------------------------------------------|---------------------------------------------------------------------------------------------------------------------------------------------------------------------------------------------------------------------------------------------------------------------------------------------------------------------------------------------------------------------------------------------------------------------------------------------------------------------------------------------------------------------------|
| Johnson <sup>22</sup> (2019)  | Retrospective analysis of a prospective registry of a single institution | USA                                    | Patients presenting with a chief complaint of neck pain and diagnosed with cervical deformity (ACD) (defined as cSVA > 40 mm)                                                                                                                                     | 36  | No surgical intervention - Questionnaires were completed before each ambulatory clinic visit for neck pain                        | NDI, EQ-5D, VAS neck pain, VAS arm pain, PROMIS physical function, PROMIS pain intensity, and PROMIS IS pain interference, mFI, CCI | Baseline                                             | - In patients with cervical deformity, less subaxial cervical lordosis (CL) had low but significant correlations with PROMIS pain intensity (CL r = -0.347, p = 0.022) and EQ-5D (CL r = 0.344, p = 0.024) but not NDI.<br>- C1-2 lordosis did not correlate significantly with any PROMIS domain or leg-acy metric, nor did PROMIS physical function or PROMIS pain interference correlate with any alignment parameter.                                                                                                 |
| Pierce <sup>4</sup> (2019)    | Retrospective analysis of single center database                         | USA                                    | Patients with ACD defined as (C2-7 Cobb > 10° or cSVA > 4 cm or TS-CL > 15°)<br>- Based on cSVA Ames-ISSG modifier 83.2% had low and 16.8% had moderate ACD.<br>- Based on TS-CL: Ames-ISSG modifier 18.8% had low, 22.1% had moderate, and 59.1% had severe ACD. | 208 | 79.3% posterior approach; 5.7% anterior surgery, and 14.9% combined approach                                                      | PROMIS scores for pain interference, PI, and PF                                                                                     | Baseline                                             | - PROMIS domain scores for Pain intensity did not differ between cSVA and TS-CL modifier severity groups.<br>- Moderate cSVA patients and Moderate/Severe TS-CL modifier groups both trended toward lower PF scores and higher pain interference scores, though this was not statistically significant (p > 0.05).                                                                                                                                                                                                        |
| Bakou-ny <sup>25</sup> (2018) | Cross-sectional observational study                                      | Lebanon                                | Patient's age ≥ 18 years with absence of cervical or back-related complaints<br>- 96.5% Subjects had at least one: Ames-ISSG modifier at grade 1 or 2                                                                                                             | 141 | No intervention                                                                                                                   | SF-36 HRQoL questionnaire                                                                                                           | Baseline                                             | All SF-36 components were similar (p > 0.05) between grades for both the TS-CL and CBVA modifiers.                                                                                                                                                                                                                                                                                                                                                                                                                        |
| Ailon <sup>14</sup> (2017)    | Retrospective analysis of a multicenter CD database                      | International Spine Study Group (ISSG) | Surgically treated ACD patients eligible for 1-yr follow-up<br>- 56.4% had cervical sagittal imbalance; 54.5% cervical kyphosis; 7.3% proximal junctional kyphosis, 9.1% coronal deformity                                                                        | 55  | 14.5 % Anterior approach; 47.3% posterior-only; 38.2% Combined anterior and posterior; 18.2% PSO; 5.5% vertebral column resection | EQ-5D, NDI, and neck pain NRS, mJOA                                                                                                 | Change from baseline to 1-yr follow-up after surgery | - Improvement in global health status as measured by mean EQ-5D (0.51 ± 0.2 to 0.66 ± 0.2, p < 0.001); 56.6% of patients improved by at least 1 MCID for EQ-5D<br>- Reduction in neck pain and neck related disability; corresponded to an increase greater than or equal to the MCID for neck pain NRS (1.3) 25 in 61.8% of patients. A reduction of NDI by at least 1 MCID (19%) was achieved in 55.6% of patients.<br>- Minimal change in myelopathy from a mean baseline mJOA of 13.3 ± 2.6 to 13.5 ± 3.0 (p = 0.675) |

(Continued to the next page)

Supplementary Table 2. Continued

| Study                        | Study design                                                      | Country/organization                   | Study population                                                                                                                                                                                            | No. | Intervention                                                                                                                                                                                                                                                                                                | PRO instruments            | Timing of PRO collection             | Main findings                                                                                                                                                                                                                                                                                                                                                                                                                                                                                           |
|------------------------------|-------------------------------------------------------------------|----------------------------------------|-------------------------------------------------------------------------------------------------------------------------------------------------------------------------------------------------------------|-----|-------------------------------------------------------------------------------------------------------------------------------------------------------------------------------------------------------------------------------------------------------------------------------------------------------------|----------------------------|--------------------------------------|---------------------------------------------------------------------------------------------------------------------------------------------------------------------------------------------------------------------------------------------------------------------------------------------------------------------------------------------------------------------------------------------------------------------------------------------------------------------------------------------------------|
| Hyun <sup>28</sup> (2018)    | Retrospective cohort study of a single institution experience     | South Korea                            | Patients with a minimum 5-yr follow-up having 3- or more level posterior cervical fusion for ACD                                                                                                            | 30  | Posterior cervical correction                                                                                                                                                                                                                                                                               | NDI, VAS                   | Postoperative                        | <ul style="list-style-type: none"> <li>- Regression models predicted a threshold C2-7 SVA value of 40.8 mm and 70.6 mm correlated with moderate and severe disability based on the NDI score, respectively.</li> <li>- Regression analyses revealed that a C2-7 SVA value of 40 mm and 70 mm corresponded to a TS-CL value of 20° and 25°, respectively.</li> <li>- No other significant correlations were identified between the radiographic parameters and VAS scores for axial neck pain</li> </ul> |
| Poorman <sup>15</sup> (2017) | Retrospective analysis of a prospective, multicenter ACD database | International Spine Study Group (ISSG) | <ul style="list-style-type: none"> <li>- Patient diagnosed with ACD and underwent surgical correction of the deformity</li> <li>- Cohort divided between those with depression vs. no depression</li> </ul> | 66  | <ul style="list-style-type: none"> <li>- Depressed group: Anterior approach (n = 8;24.2%), posterior approach (n = 17;51.5%), combined approach (n = 8;24.2%)</li> <li>- Nondepressed group: anterior approach (n = 2;6.1%); posterior approach (n = 17;51.5%); combined approach (n = 14;42.4%)</li> </ul> | NRS, EQ-5D, Neck NDI, mJOA | 3 mo, 6 mo, and 1 yr postoperatively | <ul style="list-style-type: none"> <li>- At 3 months, EQ-5D scores remained lower in the depressed group, and NDI scores were similar. Neck pain improved in the depressed group and mJOA scores remained similar.</li> <li>- At 6 months and 1 year, all HRQoL scores were similar between depressed and nondepressed groups</li> </ul>                                                                                                                                                                |
| Oe <sup>26</sup> (2017)      | Retrospective cohort study of a single institution experience     | Japan                                  | Patients diagnosed with ACD (defined as cSVA > 40 mm)                                                                                                                                                       | 118 | No intervention                                                                                                                                                                                                                                                                                             | EQ-5D                      | Baseline                             | <ul style="list-style-type: none"> <li>- In males EQ-5D in showed significantly greater deterioration the ACD group than in the non-ACD group</li> <li>- In females, no difference in EQ-5D between ACD and non-ACD groups.</li> <li>- Correlation between EQ-5D and PT, C7 SVA and C2 SVA in females</li> <li>- No correlation of EQ-5D and cervical parameters in males.</li> </ul>                                                                                                                   |

(Continued to the next page)

Supplementary Table 2. Continued

| Study                        | Study design                                         | Country/organization                   | Study population                                                                                                                                                                                                                                                                                                                                                                                                                                                           | No. | Intervention                                                                   | PRO instruments  | Timing of PRO collection               | Main findings                                                                                                                                                                                                                                                                                                                                                                                                                                                                |
|------------------------------|------------------------------------------------------|----------------------------------------|----------------------------------------------------------------------------------------------------------------------------------------------------------------------------------------------------------------------------------------------------------------------------------------------------------------------------------------------------------------------------------------------------------------------------------------------------------------------------|-----|--------------------------------------------------------------------------------|------------------|----------------------------------------|------------------------------------------------------------------------------------------------------------------------------------------------------------------------------------------------------------------------------------------------------------------------------------------------------------------------------------------------------------------------------------------------------------------------------------------------------------------------------|
| Passias <sup>32</sup> (2018) | Retrospective analysis of a multicenter ACD database | International Spine Study Group (ISSG) | Patients diagnosed with ACD as defined by the presence of at least 1 of the following on baseline imaging: cervical kyphosis (C2-7 Cobb angle > 10), cervical scoliosis (C2-7 coronal Cobb angle < 10), cSVA > 4 cm, or CBVA > 25                                                                                                                                                                                                                                          | 73  | Posterior approach EQ-5D; NDI; mJOA                                            | EQ-5D; NDI; mJOA | Baseline and 1-yr postoperative visits | <ul style="list-style-type: none"> <li>- Within primary drivers (PD) patients operated at cervical driver level showed significant 1-year HRQL improvements (Table 4) and trended toward improvement in Ames TS-CL modifier at a greater rate than did patients with PDs not included in surgery.</li> </ul>                                                                                                                                                                 |
| Passias <sup>16</sup> (2018) | Retrospective analysis of a multicenter ACD database | International Spine Study Group (ISSG) | Patients diagnosed with ACD as defined by the presence of at least 1 of the following on                                                                                                                                                                                                                                                                                                                                                                                   | 70  | 45.7% Posterior approach, 15.7% anterior approach, and 38.6% combined approach | EQ-5D; NDI; mJOA | Baseline and 1-yr postoperative visits | <ul style="list-style-type: none"> <li>- Global parameters of C2-S1 SVA and C7-S1 SVA showed significant correlations with overall 1-year mJOA, EQ-5D, and NDI.</li> </ul>                                                                                                                                                                                                                                                                                                   |
| Horn <sup>19</sup> (2020)    | Retrospective analysis of a multicenter ACD database | International Spine Study Group (ISSG) | Patients diagnosed with ACD as defined by the presence of at least 1 of the following on baseline imaging: cervical kyphosis (C2-7 Cobb angle > 10), cervical scoliosis (C2-7 coronal Cobb angle < 10), C2-7 cervical sagittal vertical axis (cSVA) > 4 cm, or chin-brow vertical angle (CBVA) > 25, and mJOA scores 17 or lesser baseline imaging: cervical kyphosis (C2-7 Cobb angle > 10), cervical scoliosis (C2-7 coronal Cobb angle < 10), cSVA > 4 cm, or CBVA > 25 | 63  | 49.2% Posterior approach, 17.5% anterior approach, and 33.3% combined approach | mJOA; EQ-5; NDI  | 1-yr postoperative improvement         | <ul style="list-style-type: none"> <li>- Improvements in functional outcomes, as defined by mJOA score, were correlated with changes in neck-based disability and general health state, defined by NDI and EQ-5D respectively.</li> <li>- While correlations exist between outcome measures, when modeling these outcomes while controlling for confounders including cSVA change, surgical invasiveness, age and CCI, these HRQoLs were not strongly correlated.</li> </ul> |

(Continued to the next page)

Supplementary Table 2. Continued

| Study                       | Study design                                                      | Country/organization                   | Study population                                                                                                                                                                                                                  | No. | Intervention                                                          | PRO instruments                                                                                                                                                                                                                                        | Timing of PRO collection        | Main findings                                                                                                                                                                                                                                                                                                                                                                                                                                                                                                                                                                                                                                                                                                                                                                                                                                                                   |
|-----------------------------|-------------------------------------------------------------------|----------------------------------------|-----------------------------------------------------------------------------------------------------------------------------------------------------------------------------------------------------------------------------------|-----|-----------------------------------------------------------------------|--------------------------------------------------------------------------------------------------------------------------------------------------------------------------------------------------------------------------------------------------------|---------------------------------|---------------------------------------------------------------------------------------------------------------------------------------------------------------------------------------------------------------------------------------------------------------------------------------------------------------------------------------------------------------------------------------------------------------------------------------------------------------------------------------------------------------------------------------------------------------------------------------------------------------------------------------------------------------------------------------------------------------------------------------------------------------------------------------------------------------------------------------------------------------------------------|
| Grosso <sup>23</sup> (2013) | Retrospective cohort study of a single institution experience     | USA                                    | Patients with myelopathic symptoms who underwent cervical deformity correction surgery                                                                                                                                            | 36  | 34 % posterior approach, and 55 % anterior approach combined approach | mJOA                                                                                                                                                                                                                                                   | Baseline and postoperative      | <ul style="list-style-type: none"> <li>- A significant relationship was observed between a greater degree of focal kyphosis correction and improved neurological outcomes (mJOA).</li> <li>- Patients with severe neurological symptoms (mJOA score &lt;12) a trend toward improved outcomes with greater global kyphosis correction.</li> <li>- Patients with an mJOA score less than 16 who attained lordosis postoperatively had a significantly greater improvement in total mJOA score than patients who maintained a kyphotic position.</li> </ul>                                                                                                                                                                                                                                                                                                                        |
| Virk <sup>8</sup> (2020)    | Retrospective analysis of a prospective, multicenter ACD database | International Spine Study Group (ISSG) | Patients diagnosed with ACD as defined by the presence of at least 1 of the following on baseline imaging: cervical kyphosis (C2-7 Cobb angle > 10), cervical scoliosis (C2-7 coronal Cobb angle < 10), cSVA > 4 cm, or CBVA > 25 | 153 | Details of surgical approaches not provided                           | NDI, mJOA, NRS-neck<br>- Postoperative outcomes were defined as "good" if a patient had ≥ 2 of the 3 following criteria<br>(1) NDI < 20 or meeting MCID, (2) mild myelopathy (mJOA ≥ 14), and (3) NRS-Neck ≤ 5 or improved by ≥ 2 points from baseline | Baseline and 1-yr postoperative | <ul style="list-style-type: none"> <li>- Within the FD cohort, maximal focal kyphosis (i.e., kyphosis at one level) was better corrected in patients with a "good" outcome</li> <li>- In the FN cohort, patients with "good" outcomes presented preoperatively with worse horizontal gaze (McGregor slope 21° vs. 6°, p = 0.061) and cSVA (72 mm vs. 60 mm, p = 0.030)</li> <li>- In the CT cohort, patients with "good" outcomes had superior global alignment both pre- (SVA: -17 mm vs. 108 mm, p &lt; 0.001) and postoperatively (50 mm vs. 145 mm, p = 0.001)</li> <li>- CT patients with "good" outcomes also had better postop cervical alignment (cSVA 35 mm vs. 49 mm, p = 0.030), and less kyphotic segments during extension</li> <li>- In the FD cohort, there were no differences between "good" and "poor" outcomes patients in preoperative alignment</li> </ul> |

(Continued to the next page)

Supplementary Table 2. Continued

| Study                      | Study design                                                  | Country/organization                   | Study population                                                                                                                    | No. | Intervention                                                            | PRO instruments         | Timing of PRO collection   | Main findings                                                                                                                                                                                                                                                                                                                                                                                                                                                                                                                                                                        |
|----------------------------|---------------------------------------------------------------|----------------------------------------|-------------------------------------------------------------------------------------------------------------------------------------|-----|-------------------------------------------------------------------------|-------------------------|----------------------------|--------------------------------------------------------------------------------------------------------------------------------------------------------------------------------------------------------------------------------------------------------------------------------------------------------------------------------------------------------------------------------------------------------------------------------------------------------------------------------------------------------------------------------------------------------------------------------------|
| Smith <sup>3</sup> (2017)  | Retrospective analysis of a multicenter ACD data-base         | International Spine Study Group (ISSG) | ACSD patients presenting for surgical treatment                                                                                     | 115 | No intervention                                                         | EQ-5D                   | Baseline                   | <ul style="list-style-type: none"> <li>- Mean ACSD EQ-5D index was 0.511 (standard definition = 0.224), which is 34% below the bottom 25th percentile (0.780) for similar age- and gender-matched US normative populations</li> <li>- Mean ACSD EQ-5D index values were worse than the bottom 25th percentile for several other disease states, including chronic ischemic heart disease (0.708), malignant breast cancer (0.708), and malignant prostate cancer (0.708)</li> <li>- EQ-5D scores did not significantly differ based on cervical deformity type (p = 0.66)</li> </ul> |
| Zhong <sup>29</sup> (2018) | Prospective cohort study in a single institution              | China                                  | Chronic AAD-related kyphosis                                                                                                        | 21  | C1-2 reduction and correction surgery                                   | NDI, SF-12 PCS, and JOA | Baseline and postoperative | <ul style="list-style-type: none"> <li>- An improvement in the JOA score was associated with changes in the C1-2 Cobb angle, C0-2 Cobb angle, and C2-7 Cobb angle</li> <li>- Improvement in NDI was associated with the changes in the C1-2 Cobb angle, C0-2 Cobb angle, C2-7 Cobb angle, C2-7 SVA, and cranial tilt</li> <li>- Amelioration of SF-12 PCS was relevant to the changes in the C1-2 Cobb angle, C0-2 Cobb angle, and C2-7 Cobb angle</li> </ul>                                                                                                                        |
| Horn <sup>19</sup> (2019)  | Retrospective analysis of a multicenter ACD data-base         | International Spine Study Group (ISSG) |                                                                                                                                     | 89  | Posterior approach (49.4%); anterior approach (16.9%); combined (33.7%) | NDI, EQ-5D, mJOA        | Baseline and postoperative | <ul style="list-style-type: none"> <li>- 80% and 60% of patients did not reach MCID for EQ-5D and NDI, respectively, and 24% of patients had severe symptoms (mJOA score 0-11)</li> </ul>                                                                                                                                                                                                                                                                                                                                                                                            |
| Bao <sup>24</sup> (2017)   | Retrospective cohort study of a single institution experience | USA                                    | Patient with ACD, no history of cervical surgery, and a well-compensated thoracolumbar profile (defined as a T1-pelvic angle < 15). | 171 | No intervention                                                         | NDI, VAS arm, VAS neck  | Baseline                   | <ul style="list-style-type: none"> <li>- C2-7 SVA and SLS as independent risk factors for low health-related quality of life</li> </ul>                                                                                                                                                                                                                                                                                                                                                                                                                                              |

(Continued to the next page)

Supplementary Table 2. Continued

| Study                                 | Study design                                                     | Country/organization                   | Study population                                                                                                                                 | No.                             | Intervention                                         | PRO instruments                                                                                                              | Timing of PRO collection        | Main findings                                                                                                                                                                                                                                                                                         |
|---------------------------------------|------------------------------------------------------------------|----------------------------------------|--------------------------------------------------------------------------------------------------------------------------------------------------|---------------------------------|------------------------------------------------------|------------------------------------------------------------------------------------------------------------------------------|---------------------------------|-------------------------------------------------------------------------------------------------------------------------------------------------------------------------------------------------------------------------------------------------------------------------------------------------------|
| Segreto <sup>20</sup> (2019)          | Retrospective analysis of a prospective multicenter ACD database | International Spine Study Group (ISSG) | Operative ACD patients (> 18 years old), undergoing a primary or revision procedure, with complete preoperative to 1-yr postoperative HRQoL data | 83                              | Surgical intervention (primary and revision surgery) | NRS-neck, NRS-back, NDI, mJOA, and EQ-5D                                                                                     | Baseline and 1-yr postoperative | Primary patients (compared to revision surgery group) exhibited significantly lower normalized NRS-neck pain scores by 6 mo (0.48 vs. 0.68; p = 0.037), as well as lower normalized NRS-neck pain (0.51 vs 0.83, p = 0.017) and improved normalized mJOA (1.11 vs. 0.97, p = 0.007) by 1-yr follow-up |
| Protosaltis <sup>30</sup> (2018) ISSG | Retrospective analysis of a prospective multicenter ACD database | International Spine Study Group (ISSG) | ACD surgical patients with apex of deformity in the cervical or cervicothoracic regions                                                          | 104                             | Surgical correction                                  | EQ5D, mJOA, NRS-neck pain, NDI                                                                                               | Baseline and 1-yr postoperative | Worse 1-yr postoperative C2 slope correlated with worse health outcomes                                                                                                                                                                                                                               |
| Lee <sup>27</sup> (2014)              | Retrospective case-control                                       | Republic of Korea                      | Patients diagnosed with ankylosing spondylitis (AS)                                                                                              | 102 AS patients and 50 controls | No intervention                                      | VAS for neck pain, NDI, NPAD, scale and bath ankylosing spondylitis disease activity index were administered to evaluate QoL | Baseline                        | Correlation analysis revealed significant relationships between radiographic parameters and QoL. In particular, C2-7 SVA was found to be a significant predictor of QoL in AS patient                                                                                                                 |

PRO, pedicle subtraction osteotomy; ACD, adult cervical deformity; cSVA, C2-7 sagittal vertical axis; NDI, Neck Disability Index; EQ-5D, EuroQoL 5-Dimension; VAS, visual analogue scale; PROMIS, Patient-Reported Outcomes Measurement Information System; mFI<sub>1</sub>, CCI, Charlson Comorbidity Index ; TS-CL, T1 slope minus cervical lordosis; PI, pelvic incidence; PE, physical function; SF-36, 36-item Short Form Health Survey; HRQoL, health-related quality of life; CBVA, correlation of chin-brow vertical angle; NRS, Numerical Rating Scale; mJOA, modified Japanese Orthopedic Association; MCID, minimal clinically important difference; FD, focal deformity; FN, flat neck; ACSD, adult cervical spine deformity; AAD, atlantoaxial anterior dislocation; SF-12 PCS, 12-item Short Form health survey; physical composite score; SLS, slope of line of sight; NPAD, neck pain and disability.
